# Supplementary material for: Kinetics of the reversible inclusion of flavopereirine in cucurbit[7]uril
Source: Royal Society of Chemistry journal article supplement (doi:10.1039/c6cp07553c), 2016-11-24
Supplement: c6cp07553c1.pdf [file c6cp07553c1.pdf]

## Supporting Information

### **Kinetics of the reversible inclusion of flavopereirine in cucurbit[7]uril**

**Zsombor Miskolczy,<sup>a</sup> László Biczók<sup>\*a</sup>, and István Jablonkai<sup>b</sup>**

*<sup>a</sup>Institute of Materials and Environmental Chemistry, Research Centre for Natural Sciences,  
Hungarian Academy of Sciences, P.O. Box 286, 1519 Budapest, Hungary*

*<sup>b</sup>Institute of Organic Chemistry, Research Centre for Natural Sciences, Hungarian Academy  
of Sciences, P.O. Box 286, 1519 Budapest, Hungary*

---

\* Corresponding author. E-mail: biczok.laszlo@tk.mta.hu

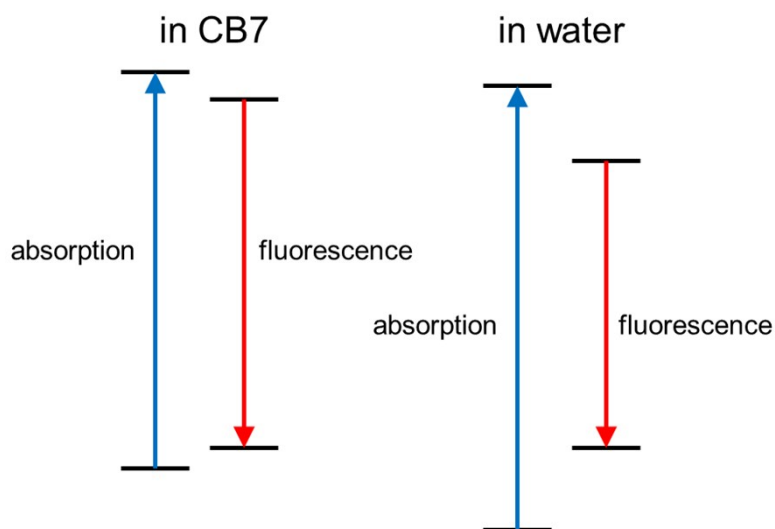

**Figure S1** Effect of the local environment on the absorption and fluorescence of flavopereirine

Figure S1 illustrates why the absorption spectrum is red-shifted and the fluorescence spectrum is blue-shifted upon encapsulation of flavopereirine in the apolar cavity of CB7. Quantum chemical calculations for related compounds have shown that the electron density on the nitrogen of the pyrrole ring decreases upon excitation to the lowest singlet-excited state ( $S_1$ ).<sup>1</sup> Such an effect weakens the hydrogen bonding and van der Waals interactions of flavopereirine with water in the lowest singlet-excited state ( $S_1$ ) compared to that in the ground state ( $S_0$ ). Therefore, the energy of  $S_1$  state diminishes to a smaller extent than the energy of the ground state when the flavopereirine is moved from CB7 cavity into water. As a result, the  $S_1$ – $S_0$  energy gap observed by absorption becomes larger in water than in CB7. After photon absorption, vibrational relaxation and reorganisation of the microenvironment occur. These processes lead to more substantial energy gain when flavopereirine is located in water. Weaker interactions with the apolar CB7 cavity allow less significant energy diminution upon reaching the relaxed  $S_1$  state. Similarly, the state obtained immediately after fluorescence emission can lose more energy in the course of the structural changes in the local environment when flavopereirine interacts with water instead of CB7. Thus, the photon emitted by water-solvated flavopereirine has lower energy than that originating from CB7 complex.

## Reference

1. A. Dias, A. P. Varela, M. D. G. Miguel, A. L. Macanita and R. S. Becker, *J. Phys. Chem.*, 1992, 96, 10290-10296.

## Analysis of the stopped-flow results on the reversible binding of flavopereirine in CB7

Flavopereirine (Fla) produces a 1:1 inclusion complex (Fla–CB7) with cucurbit[7]uril (CB7).

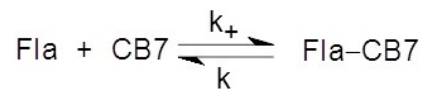

The changes of the concentrations of the components are defined by the following differential equations:

$$\frac{d[\text{Fla} - \text{CB7}]}{dt} = k_+ [\text{Fla}][\text{CB7}] - k_- [\text{Fla} - \text{CB7}] \quad (\text{S1})$$

$$-\frac{d[\text{Fla}]}{dt} = k_+ [\text{Fla}][\text{CB7}] - k_- [\text{Fla} - \text{CB7}] \quad (\text{S2})$$

$$-\frac{d[\text{CB7}]}{dt} = k_+ [\text{Fla}][\text{CB7}] - k_- [\text{Fla} - \text{CB7}] \quad (\text{S3})$$

where  $k_+$  and  $k_-$  are the rate constants for the inclusion and dissociation, respectively. The overall fluorescence intensity at the wavelength of detection ( $I$ ) is the sum of the emission intensities originating from excited Fla and Fla–CB7. As we use very dilute solutions, the fluorescence intensities are directly proportional to the fluorophor concentrations.

$$I = I(\text{Fla})[\text{Fla}] + I(\text{Fla} - \text{CB7})[\text{Fla} - \text{CB7}] \quad (\text{S4})$$

where  $I(\text{Fla})$  and  $I(\text{Fla} - \text{CB7})$  denote the parameters proportional to the fluorescence efficiency of Fla and Fla–CB7 at the wavelength of detection.

Starting with the initial estimates of  $k_+$  and  $k_-$ , eqs S1–S3 were solved numerically using the total concentrations of Fla and CB7 as initial concentrations, while  $[\text{Fla} - \text{CB7}] = 0$  M was taken for the concentration of the inclusion complex at  $t = 0$  s. Then, the fluorescence intensity ( $I$ ) was calculated on the basis of eq S4 and the iterations were repeated until the best

fit was achieved. The  $k_+$ ,  $I(Fla_0)$  and  $I(Fla-CB7)$  parameters were fitted, whereas  $k_-$  value determined by independent experiments were kept constant in the regression analysis.

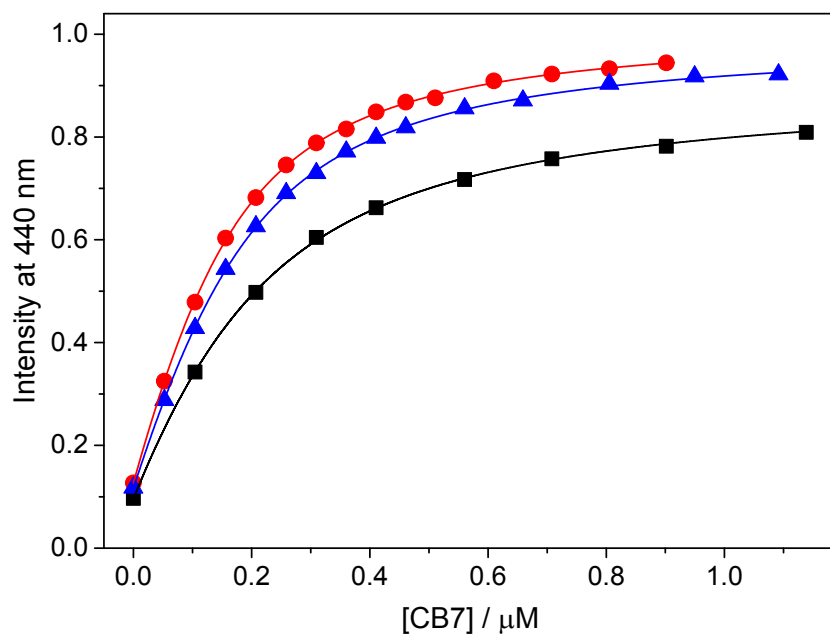

**Figure S2** Fluorescence intensity alteration at 440 nm as a function of CB7 concentration in 0.16  $\mu\text{M}$  Fla aqueous solution at 333 (●), 340 (▲), and 355 K (■). Excitation was performed at 355 nm. The lines represent the fitted functions.
